# Supplementary material for: Evaluation of back scatter interferometry, a method for detecting protein binding in solution
Source: Royal Society of Chemistry journal article supplement (doi:10.1039/c4an01129e), 2014-11-28
Supplement: c4an01129e1.pdf [file c4an01129e1.pdf]

## SUPPLEMENTARY INFORMATION

### Evaluation of Back Scatter Interferometry, a method for detecting protein binding in solution

S. T. Jepsen,<sup>a</sup> T. M. Jørgensen,<sup>b</sup> W. Zong,<sup>c</sup> T. Trydal,<sup>a</sup> S. R. Kristensen<sup>a</sup> and H. S. Sørensen<sup>c</sup>

<sup>a</sup> Dept. of Clinical Biochemistry, Aalborg University Hospital, Hobrovej 18-22, 9000 Aalborg, Denmark.

<sup>b</sup> Dept. of Applied Mathematics and Computer Science, Technical University of Denmark, Richard Petersens Plads, Building 324, 2800 Kgs. Lyngby, Denmark

<sup>c</sup> Dept. of Photonic Engineering, Technical University of Denmark, Frederiksborgvej 399, 4000 Roskilde, Denmark.

#### Recorded fringe pattern

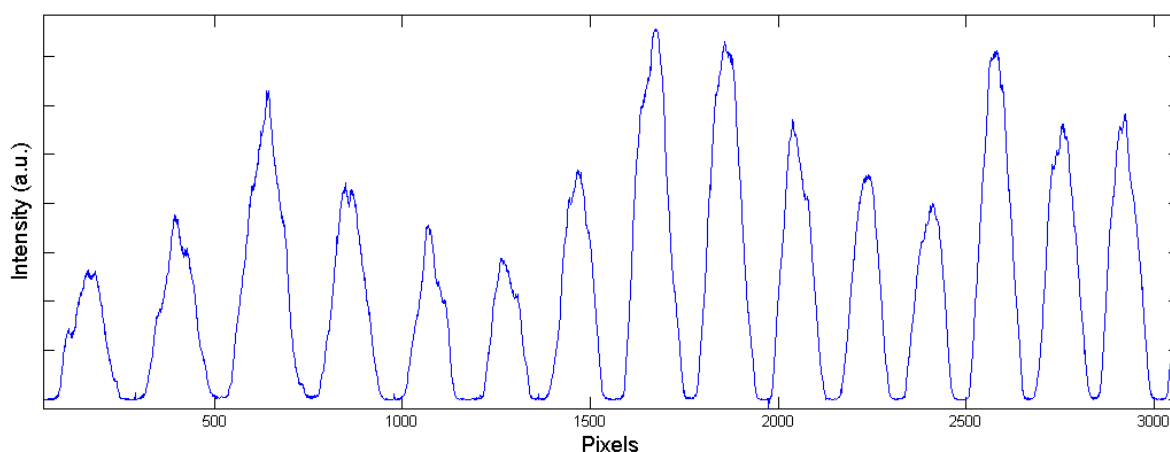

Figure 1

Figure 1 shows a typical image of the fringe pattern as recorded by the linear CCD. Y-axis is intensity in arbitrary units i.e. high intensity equals the bright spots in the interference pattern.

#### IgG - Protein A Binding experiments

The IgG Protein A binding experiments was also performed with 2.5 nM Protein A corresponding to that used by; *D. J. Bornhop, J. C. Latham, A. Kussrow, D. A. Markov, R. D. Jones, and H. S. Sørensen, Science, 2007, 317, 1732–6* and data from one of several experiments are shown below.

We find no evidence in our data of a measurable change in refractive index between bound and unbound IgG.

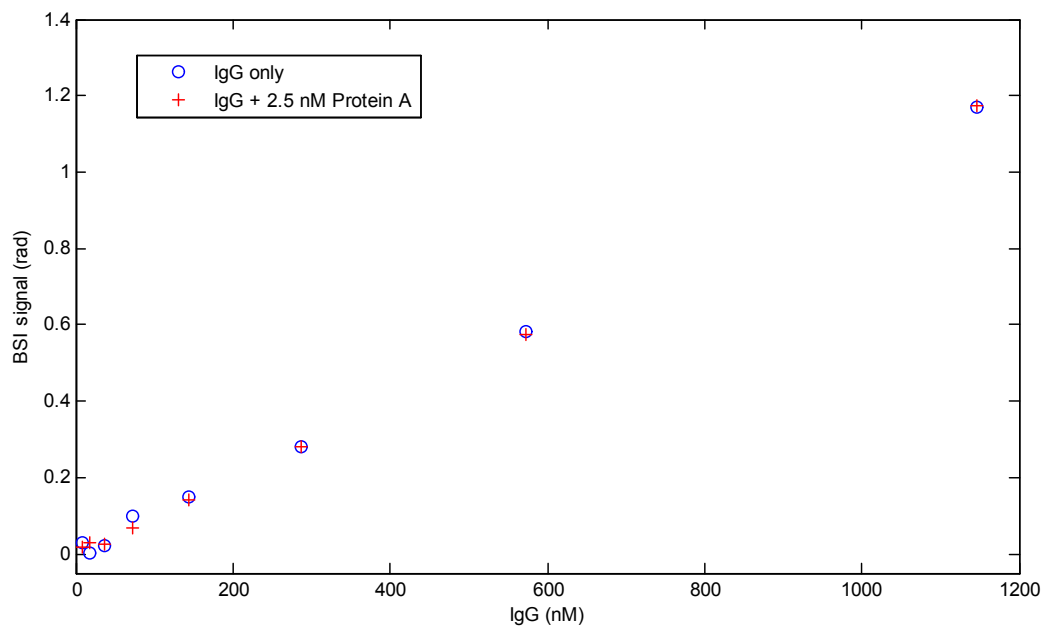

Figure 2

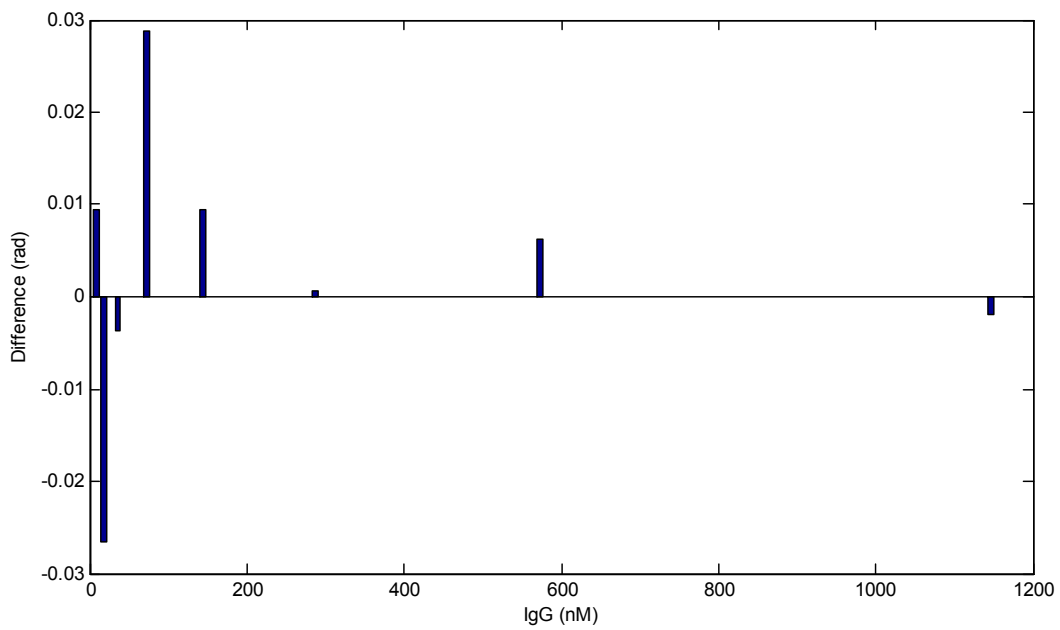

Figure 3

Figure 2 shows end-point data of 2.5 nM Protein A incubated with 17-1150 nM IgG (+) and IgG without addition of Protein A (o). Figure 3 shows the signal difference between data with/without Protein A.
